# Supplementary material for: Impact of COVID-19 Restrictions in Portugal: A Questionnaire to Municipal and Animal Association Shelters
Source: MDPI journal article supplement (doi:10.3390/ani11092532), 2021-08-28
Supplement: s1 [file s1]

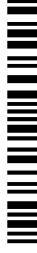

**A7. Qual o ano das últimas obras de remodelação do Alojamento?**

|     |  |
|-----|--|
| Sim |  |
| Não |  |

Sim  
Não

edagem sem Fins Lucrativos - com adoção  
despedagem sem Fins Lucrativos - santuário  
Centro de Recolha Oficial Municipal  
Centro de Recolha Oficial Intermunicipal  
Outro

Outro

**De acordo com o mapa supra indique a localização do Abrigo:**

*As Regiões Autônomas da Madeira e Açores estão contempladas nas respostas apesar de não se encontrarem no mapa.*

*Fonte da imagem: Wikipédia*

|                             |
|-----------------------------|
| Não responde                |
| Minho                       |
| Trás-os-Montes e Alto Douro |
| Douro Litoral               |
| Beira Alta                  |
| Beira Litoral               |
| Beira Baixa                 |
| Extremadura                 |
| Ribatejo                    |
| Alto Alentejo               |
| Baixo Alentejo              |
| Algarve                     |
| Madeira                     |
| Açores                      |

### **fundos públicos (estatais)?**

|         |  |
|---------|--|
| 100%    |  |
| >80-99% |  |
| >50-80% |  |
| 20-50%  |  |
| <20%    |  |

|                 |  |  |
|-----------------|--|--|
| Anterior a 2001 |  |  |
| 2001-2013       |  |  |
| Após 2013       |  |  |

Abandono nas instalações  
Entrega nas instalações pelo detentor  
Proveniente de CROAs ou associações  
Capturado

## Qual o ano das últimas obras de remodelação do Alojamento?

Sim  
Não  
Outro

\_\_\_\_\_

|                 | Sim | Não |
|-----------------|-----|-----|
| Cães            |     |     |
| Gatos           |     |     |
| Outras espécies |     |     |

[illegible]

\_\_\_\_\_

|  |  |  |  |
|--|--|--|--|
|  |  |  |  |
|--|--|--|--|

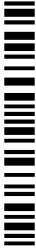

C11. No último ano, na sua opinião, verificou-se um aumento de animais errantes devido a restrições de admissão em alojamentos?

|         |
|---------|
| Sim     |
| Não     |
| Não sei |

C12. Na sua opinião, qual o impacto que as seguintes medidas poderão ter no sentido de diminuir a sobrelotação dos Alojamentos?

|                                                           | Muito impactante | Impactante | Pouco impactante | Não responde |
|-----------------------------------------------------------|------------------|------------|------------------|--------------|
| Sensibilizar para a detenção responsável                  |                  |            |                  |              |
| Aumentar a lotação e capacidade dos Alojamentos           |                  |            |                  |              |
| Permitir a eutanásia para salvaguardar o bem-estar animal |                  |            |                  |              |
| Promover o controlo reprodutivo                           |                  |            |                  |              |
| Promover a adoção de animais                              |                  |            |                  |              |

C13. Que medidas adicionais sugere para diminuir a sobrelotação dos Alojamentos?

## Secção D: IV. FUNCIONALIDADE

D1. Recursos Humanos, indique o número atualmente ligado ao Alojamento (inclui temporários):

|                                      | Nenhum | 1 | 2 | 3 | 4 | 5 - 10 | > 10 |
|--------------------------------------|--------|---|---|---|---|--------|------|
| Total de colaboradores               |        |   |   |   |   |        |      |
| Quantos em exclusividade             |        |   |   |   |   |        |      |
| Médicos Veterinários                 |        |   |   |   |   |        |      |
| Enfermeiros Veterinários             |        |   |   |   |   |        |      |
| Tratadores/ assistentes veterinários |        |   |   |   |   |        |      |
| Voluntários                          |        |   |   |   |   |        |      |

D2. Caso aceitem voluntários, indique:

|                                             | Sim | Não | Não aplicável |
|---------------------------------------------|-----|-----|---------------|
| Existe oferta regular de voluntários        |     |     |               |
| Há regulamentação própria para voluntariado |     |     |               |

D3. Existe um Regulamento interno de funcionamento implementado?

|     |
|-----|
| Sim |
| Não |

D4. Existe um Plano de lavagem, higienização e desinfeção do Alojamento?

|     |
|-----|
| Sim |
| Não |

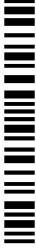

|                          |
|--------------------------|
| Separção cães-gatos      |
| Enriquecimento ambiental |
| Formação em BEA          |
| Nutrição                 |
| Vacinação                |
| Desparasitação           |
| Outro                    |

Outro

K3. Durante o estado de emergência nacional da COVID-19 observou:

|                                                                  |
|------------------------------------------------------------------|
| Falta de instruções oficiais/uniformidade nas regras de admissão |
| Dificuldade financeira                                           |
| Ausência/diminuição de voluntariado                              |
| Sem resposta                                                     |

K4. Considera que o confinamento COVID-19 teve as seguintes consequências:

|                                        |
|----------------------------------------|
| Aumento do abandono                    |
| Aumento da adoção                      |
| Redução da adoção                      |
| Redução na frequência do apoio clínico |
| Redução no fornecimento de alimentos   |
| Redução de passeios e interação        |
| Sem resposta                           |

K5. Pode partilhar aqui algumas preocupações, sugestões ou comentários:

K6. Se estiver disponível para ser contactado para colaborações futuras sobre Medicina Veterinária de Abrigo, indique um endereço email:

Muito obrigado pela participação.
